# Supplementary material for: Kinetic studies of the heterogeneous oxidation of maleic and fumaric acid aerosols by ozone under conditions of high relative humidity
Source: Royal Society of Chemistry journal article supplement (doi:10.1039/b924775k), 2010-01-01
Supplement: b924775k.pdf [file b924775k.pdf]

## Supporting material:

### Kinetics of the ozonolysis reaction with maleic and fumaric acid aqueous aerosols

The kinetics of the reaction between ozone and aqueous maleic/fumaric acid aerosols were followed by monitoring the production of gas-phase products:  $\text{HCO}_2\text{H}$  (formic acid) and  $\text{CO}_2$ . Whilst  $\text{CO}_2$  was calculated from integration of the peak area between  $2380$  and  $2320\text{ cm}^{-1}$  (background  $2400$ - $2300\text{ cm}^{-1}$ ),  $\text{HCO}_2\text{H}$  (formic acid) concentration was calculated from integration of the peak area between  $1800$  and  $1780\text{ cm}^{-1}$  with baseline  $1805.0$ - $1777.6\text{ cm}^{-1}$ . From the slope of linear-square fits to the decay plots of the formation of these gas-phase products, the  $k_f$  (pseudo-first-order rate coefficients) were calculated. The uncertainties on  $k_f$  were determined as the standard error of the slope at the 95% confidence interval. The calculated  $k_f$  values are shown plotted as function of the ozone concentrations for maleic acid (Fig. 1S) and fumaric acid (Fig. 2S) aqueous aerosol particles.

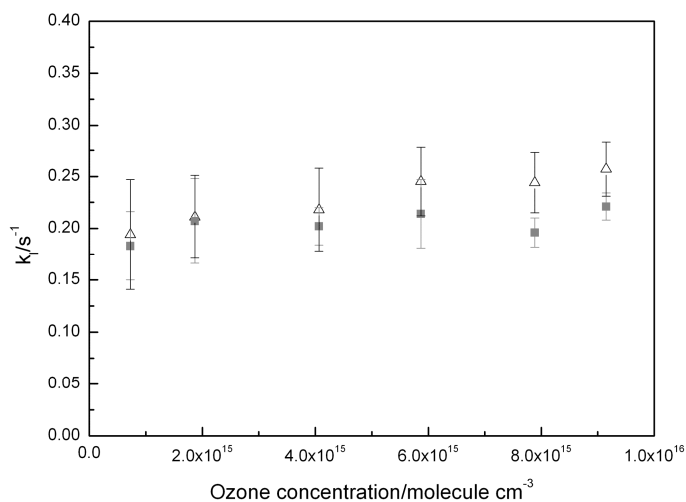

**Fig. S1:** Pseudo-first order reaction rate constants for aqueous maleic acid aerosol particles as function of the ozone concentration. Calculated  $k_f$  values from  $\text{HCO}_2\text{H}$  and  $\text{CO}_2$  are shown as grey squares and open up triangles, respectively.

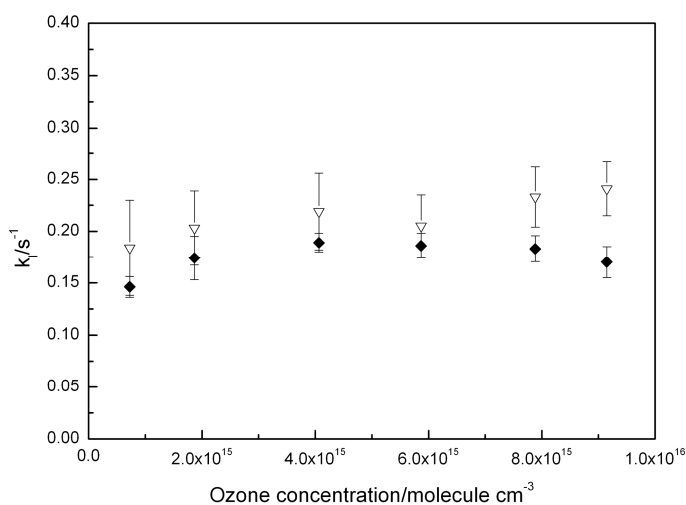

**Fig. S2:** Pseudo-first order reaction rate constants for aqueous fumaric acid aerosol particles as function of the ozone concentration. Calculated  $k_f$  values from  $\text{HCO}_2\text{H}$  and  $\text{CO}_2$  are shown as black diamonds and open down triangles, respectively.
